# Supplementary material
Source: PubMed Central journal article supplement (PMC4546876)
Supplement: NIHMS703768-supplement-1.pdf [file NIHMS703768-supplement-1.pdf]

## Supplementary Figure S1

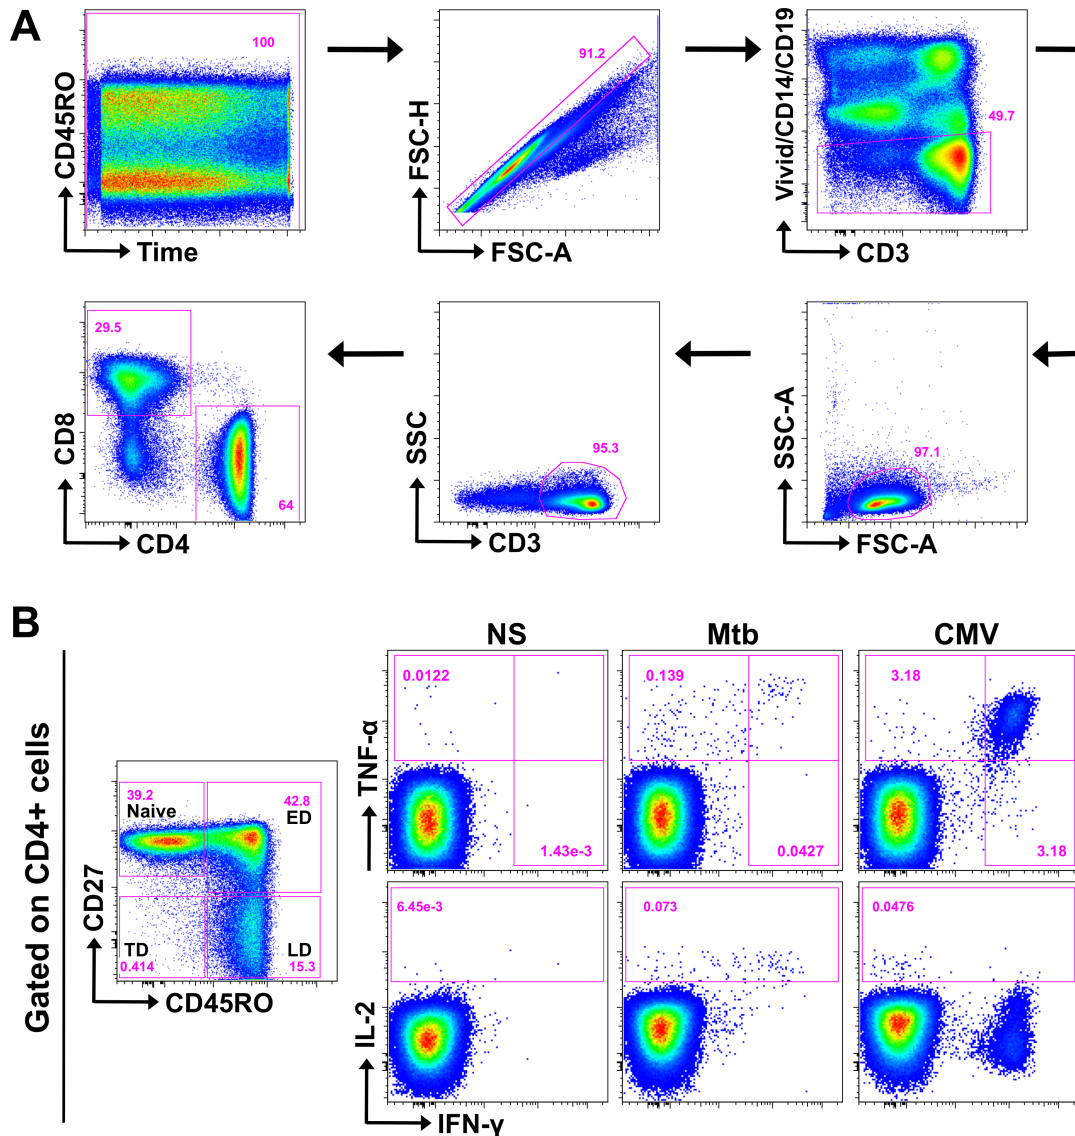

**Supplementary Figure S1: Gating strategy.** Singlets were identified in forward scatter plots. Dead cells, B cells and monocytes were excluded by Vivid, CD19 and CD14 labeling, respectively. Memory subsets were discriminated based on the expression of CD27 and CD45RO, allowing for the discrimination of four subpopulations (Naïve: CD45RO-CD27+; Early-differentiated (ED): CD45RO+CD27+, Late differentiated (LD): CD45RO+CD27-, and Terminally-differentiated (TD): CD45RO-CD27-). Gates applied for the identification of cytokine positive cells were set according to the unstimulated samples (NS).

## Supplementary Figure S2

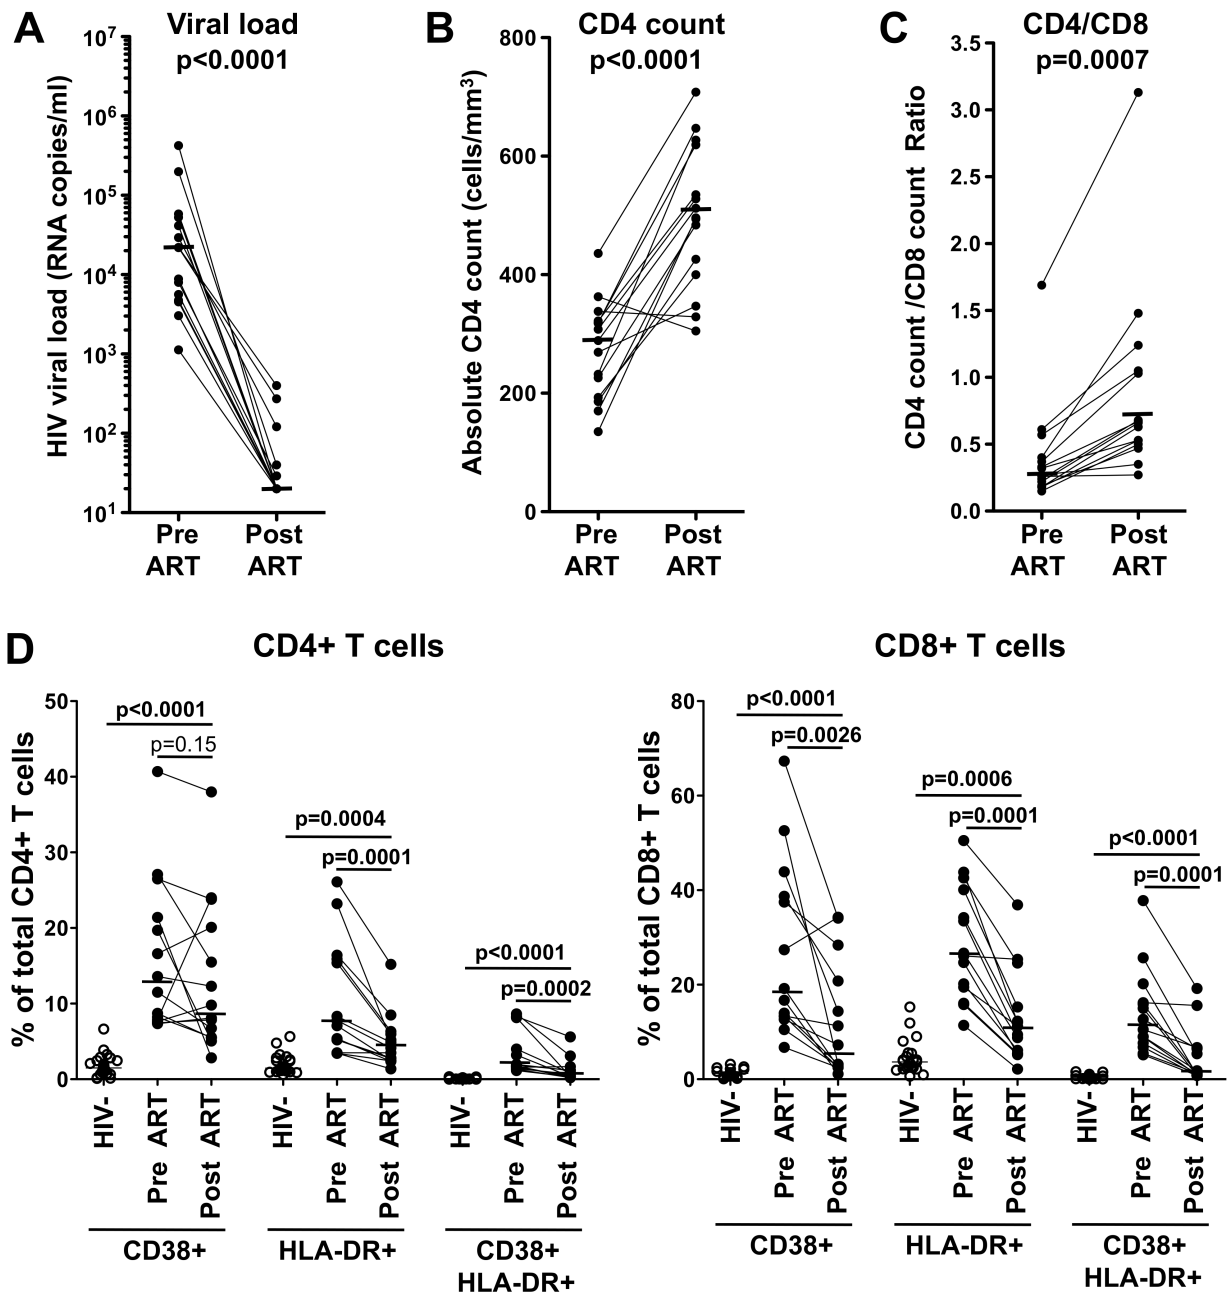

**Supplementary Figure S2. Effect of ART on clinical and activation parameters.** Plasma viral load (A), absolute CD4 count (B) and CD4/CD8 ratio (C) before (Pre-ART) and 12 months after ART initiation (Post-ART) in 15 HIV-infected individuals. (D) T cell activation (CD38, HLA-DR) is shown for CD4+ and CD8+ T cells. Closed circles depict HIV-infected individuals (n=14) and open circles depict HIV-uninfected individuals (n=23). Statistical analysis was performed using non-parametric statistical tests (Mann-Whitney and Wilcoxon matched pair tests for unmatched and matched samples, respectively). A p-value  $< 0.05$  was considered significant. Effective ART of 1 year duration results in an overall decline in T cell activation, although this still remained higher than in HIV-uninfected individuals.

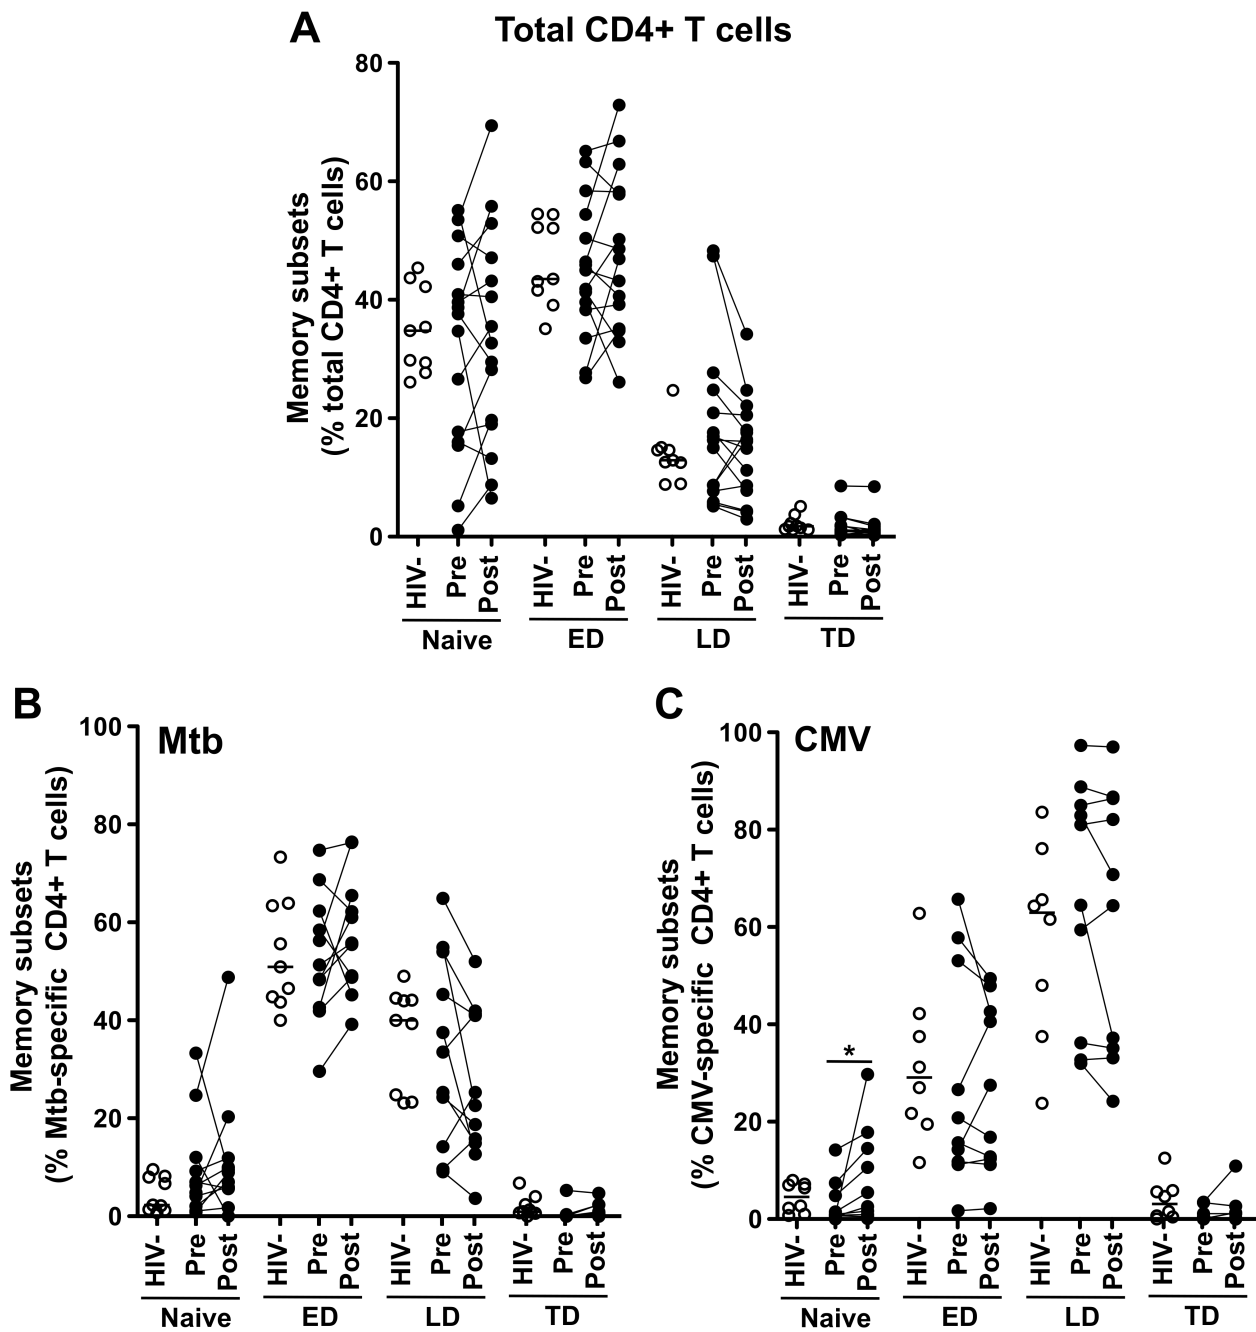

**Supplementary Figure S3: Comparison of the memory profile of Mtb- and CMV-specific CD4+ T cells pre- and post-ART.** Memory profile of total CD4+ T cells (A), Mtb-specific CD4+ T cells (B) and CMV-specific CD4+ T cells (C) pre- and post-ART initiation. For comparison the memory profile of total and antigen-specific CD4 responses in HIV-uninfected individuals (n=9) is presented on each graph with open circles. Each symbol represents one individual. Statistical comparisons were performed using a Wilcoxon matched pairs test for comparison of pre- and post-ART time points and the Mann Whitney test for comparisons with HIV-uninfected individuals. \*  $p < 0.05$ .
